# Supplementary material for: Effect of Maltodextrin and Temperature on Micellar Behavior of Bile Salts in Aqueous Medium: Conductometric and Spectrofluorimetric Studies
Source: publisher site journal article supplement (doi:10.1515/zpch-2017-1060), 2018-12-05
Supplement: Supplementary file 1 [file zpch-2017-1060_suppl.docx]

**Effect of Maltodextrin and Temperature on Micellar Behavior of Bile Salts in Aqueous Medium: Conductometric and Spectrofluorimetric Studies**

Suvarcha Chauhan*, Vivek Sharma, Kuldeep Singh and M.S. Chauhan

Department of Chemistry, Himachal Pradesh University, Summer Hill, Shimla 171005, India

*Corresponding author: Tel.: +91 177 2830803; fax: +91 177 2830775

E-mail address: scschauhan19@gmaill.com (Suvarcha Chauhan)

**“Supplementary data”**

**TABLE S1**

Conductivity,, for sodium cholate and sodium deoxyholate in pure water and aqueous solutions of maltodextrin at different temperatures.

| / S∙cm-1 | | | | | | | | | | | | |
| --- | --- | --- | --- | --- | --- | --- | --- | --- | --- | --- | --- | --- |
| Sodium cholate | | | | | |  | Sodium deoxycholate | | | | | |
| ma /  mmol∙kg-1 | 293.15 K | 298.15 K | 303.15 K | 308.15 K | 313.15 K | mb / mmol∙kg-1 | 293.15 K | 298.15 K | 303.15 K | 308.15 K | 313.15 K |
| Pure water | | | | | | | | | | | | |
| 1 | 67 | 67 | 61 | 72 | 79 |  | 0.5 | 36 | 37 | 39 | 37.5 | 39 |
| 2 | 123 | 135 | 129 | 143 | 148 |  | 1.0 | 71 | 67 | 69 | 67 | 69 |
| 3 | 188 | 197 | 194 | 210 | 216 |  | 1.5 | 100 | 97 | 99 | 98 | 106 |
| 4 | 244 | 265 | 258 | 273 | 276 |  | 2.0 | 130 | 128 | 129 | 127 | 132 |
| 5 | 303 | 323 | 319 | 338 | 339 |  | 2.5 | 158 | 161 | 154 | 156 | 165 |
| 6 | 363 | 386 | 379 | 402 | 410 |  | 3.0 | 190 | 186 | 190 | 189 | 197 |
| 7 | 420 | 444 | 454 | 465 | 468 |  | 3.5 | 215 | 217 | 217 | 221 | 225 |
| 8 | 482 | 503 | 514 | 524 | 531 |  | 4.0 | 249 | 246 | 247 | 253 | 250 |
| 9 | 540 | 578 | 580 | 592 | 599 |  | 4.5 | 279 | 276 | 278 | 287 | 284 |
| 10 | 599 | 627 | 629 | 643 | 663 |  | 5.0 | 306 | 307 | 304 | 312 | 308 |
| 11 | 657 | 680 | 684 | 708 | 730 |  | 5.5 | 337 | 341 | 334 | 337 | 341 |
| 12 | 723 | 736 | 742 | 774 | 801 |  | 6.0 | 360 | 366 | 357 | 368 | 368 |
| 13 | 786 | 802 | 798 | 831 | 858 |  | 6.5 | 384 | 391 | 380 | 387 | 390 |
| 14 | 841 | 857 | 850 | 874 | 913 |  | 7.0 | 403 | 409 | 409 | 414 | 407 |
| 15 | 896 | 908 | 908 | 941 | 962 |  | 7.5 | 426 | 431 | 433 | 440 | 431 |
| 16 | 947 | 950 | 960 | 992 | 1025 |  | 8.0 | 447 | 450 | 456 | 463 | 459 |
| 17 | 998 | 998 | 1015 | 1047 | 1076 |  | 8.5 | 467 | 467 | 482 | 484 | 482 |
| 18 | 1039 | 1038 | 1069 | 1092 | 1129 |  | 9.0 | 487 | 490 | 501 | 507 | 509 |
| 19 | 1078 | 1080 | 1120 | 1152 | 1184 |  | 9.5 | 505 | 518 | 523 | 529 | 521 |
| 20 | 1126 | 1111 | 1169 | 1204 | 1228 |  | 10.0 | 523 | 534 | 544 | 556 | 546 |
| cmMal / mmol∙kg-1 = 0.5 | | | | | | | | | | | | |
| 1 | 94.5 | 97.5 | 99.2 | 102.5 | 106.2 |  | 0.5 | 65.4 | 67.6 | 68.1 | 68.1 | 72.6 |
| 2 | 154.2 | 156 | 160 | 162.3 | 171.2 |  | 1.0 | 97.6 | 102.7 | 102.8 | 102.8 | 106.2 |
| 3 | 212 | 215 | 218 | 223 | 233 |  | 1.5 | 128.8 | 139.4 | 137.9 | 137.9 | 142.5 |
| 4 | 269 | 264 | 277 | 284 | 293 |  | 2.0 | 160.1 | 171.1 | 168.4 | 168.4 | 177.8 |
| 5 | 334 | 338 | 342 | 341 | 346 |  | 2.5 | 190.2 | 203 | 201 | 201 | 210 |
| 6 | 385 | 389 | 392 | 397 | 404 |  | 3.0 | 222 | 232 | 233 | 233 | 243 |
| 7 | 437 | 442 | 447 | 455 | 461 |  | 3.5 | 249 | 262 | 264 | 264 | 276 |
| 8 | 488 | 497 | 507 | 505 | 518 |  | 4.0 | 279 | 295 | 296 | 296 | 308 |
| 9 | 540 | 551 | 561 | 559 | 576 |  | 4.5 | 309 | 325 | 326 | 326 | 340 |
| 10 | 594 | 609 | 622 | 614 | 633 |  | 5.0 | 340 | 355 | 358 | 358 | 370 |
| 11 | 645 | 660 | 678 | 669 | 687 |  | 5.5 | 369 | 386 | 387 | 387 | 403 |
| 12 | 696 | 712 | 722 | 722 | 740 |  | 6.0 | 397 | 414 | 417 | 417 | 433 |
| 13 | 742 | 756 | 772 | 774 | 791 |  | 6.5 | 425 | 443 | 446 | 446 | 464 |
| 14 | 791 | 812 | 822 | 824 | 849 |  | 7.0 | 455 | 474 | 476 | 476 | 495 |
| 15 | 840 | 856 | 872 | 874 | 896 |  | 7.5 | 482 | 504 | 506 | 506 | 525 |
| 16 | 888 | 906 | 922 | 925 | 944 |  | 8.0 | 512 | 533 | 534 | 534 | 555 |
| 17 | 936 | 952 | 972 | 978 | 985 |  | 8.5 | 538 | 562 | 562 | 562 | 585 |
| 18 | 978 | 984 | 1008 | 1013 | 1027 |  | 9.0 | 566 | 589 | 593 | 593 | 615 |
| 19 | 1010 | 1020 | 1039 | 1048 | 1058 |  | 9.5 | 593 | 619 | 621 | 621 | 643 |
| 20 | 1037 | 1046 | 1067 | 1078 | 1087 |  | 10.0 | 619 | 647 | 648 | 648 | 674 |
| cmMal / mmol∙kg-1 = 1.1 | | | | | | | | | | | | |
| 1 | 130.2 | 127.8 | 131 | 136.7 | 139.6 |  | 0.5 | 97.6 | 97.3 | 100.4 | 102.1 | 104.3 |
| 2 | 194.4 | 189 | 195 | 203 | 203.6 |  | 1.0 | 128.3 | 129.1 | 132.4 | 137.7 | 138.4 |
| 3 | 252 | 250 | 253 | 265 | 267 |  | 1.5 | 158.9 | 159.4 | 164.1 | 168.8 | 173.5 |
| 4 | 309 | 309 | 311 | 326 | 327 |  | 2.0 | 191.5 | 191.7 | 193.2 | 200 | 206 |
| 5 | 369 | 367 | 372 | 391 | 394 |  | 2.5 | 220 | 221 | 222 | 234 | 239 |
| 6 | 403 | 406 | 415 | 425 | 431 |  | 3.0 | 250 | 252 | 254 | 267 | 271 |
| 7 | 453 | 459 | 469 | 479 | 491 |  | 3.5 | 279 | 279 | 286 | 296 | 305 |
| 8 | 508 | 514 | 515 | 535 | 545 |  | 4.0 | 310 | 310 | 316 | 327 | 335 |
| 9 | 557 | 568 | 568 | 592 | 598 |  | 4.5 | 338 | 338 | 345 | 357 | 369 |
| 10 | 612 | 619 | 616 | 644 | 653 |  | 5.0 | 366 | 366 | 374 | 389 | 400 |
| 11 | 664 | 670 | 672 | 696 | 707 |  | 5.5 | 395 | 395 | 402 | 418 | 429 |
| 12 | 712 | 719 | 726 | 751 | 763 |  | 6.0 | 421 | 422 | 432 | 447 | 459 |
| 13 | 758 | 772 | 779 | 795 | 817 |  | 6.5 | 450 | 455 | 459 | 476 | 490 |
| 14 | 809 | 819 | 824 | 845 | 868 |  | 7.0 | 477 | 477 | 487 | 506 | 519 |
| 15 | 861 | 867 | 872 | 898 | 917 |  | 7.5 | 501 | 506 | 515 | 536 | 546 |
| 16 | 904 | 915 | 926 | 948 | 963 |  | 8.0 | 530 | 533 | 542 | 568 | 573 |
| 17 | 949 | 959 | 973 | 997 | 1019 |  | 8.5 | 557 | 560 | 570 | 594 | 605 |
| 18 | 990 | 1008 | 1020 | 1042 | 1070 |  | 9.0 | 583 | 587 | 597 | 624 | 634 |
| 19 | 1044 | 1055 | 1070 | 1090 | 1118 |  | 9.5 | 611 | 614 | 623 | 651 | 663 |
| 20 | 1088 | 1108 | 1119 | 1136 | 1167 |  | 10.0 | 637 | 640 | 647 | 678 | 688 |
| cmMal / mmol∙kg-1 = 1.6 | | | | | | | | | | | | |
| 1 | 154.5 | 158.8 | 156.4 | 156.4 | 164 |  | 0.5 | 124.2 | 128.6 | 127.8 | 128.4 | 130.6 |
| 2 | 210 | 212 | 212 | 217 | 225 |  | 1.0 | 152.8 | 156.2 | 157.8 | 164.3 | 165.9 |
| 3 | 263 | 265 | 267 | 279 | 289 |  | 1.5 | 185.1 | 186.6 | 189.5 | 190 | 194 |
| 4 | 322 | 326 | 329 | 337 | 343 |  | 2.0 | 210.3 | 214 | 218 | 223 | 225 |
| 5 | 376 | 378 | 389 | 394 | 404 |  | 2.5 | 243 | 244 | 246 | 253 | 258 |
| 6 | 428 | 434 | 445 | 451 | 462 |  | 3.0 | 273 | 275 | 278 | 283 | 289 |
| 7 | 478 | 487 | 499 | 505 | 522 |  | 3.5 | 301 | 304 | 306 | 316 | 321 |
| 8 | 533 | 542 | 545 | 561 | 576 |  | 4.0 | 330 | 333 | 336 | 343 | 347 |
| 9 | 582 | 596 | 598 | 618 | 629 |  | 4.5 | 359 | 362 | 363 | 371 | 378 |
| 10 | 637 | 647 | 646 | 670 | 684 |  | 5.0 | 387 | 389 | 393 | 404 | 407 |
| 11 | 689 | 698 | 702 | 722 | 738 |  | 5.5 | 413 | 415 | 419 | 431 | 435 |
| 12 | 737 | 747 | 756 | 777 | 794 |  | 6.0 | 439 | 441 | 448 | 458 | 464 |
| 13 | 783 | 800 | 809 | 821 | 848 |  | 6.5 | 466 | 468 | 474 | 486 | 492 |
| 14 | 834 | 847 | 854 | 871 | 899 |  | 7.0 | 493 | 495 | 501 | 514 | 521 |
| 15 | 886 | 895 | 902 | 924 | 948 |  | 7.5 | 515 | 522 | 528 | 540 | 549 |
| 16 | 929 | 943 | 956 | 974 | 994 |  | 8.0 | 543 | 547 | 553 | 569 | 577 |
| 17 | 974 | 987 | 1003 | 1023 | 1050 |  | 8.5 | 570 | 573 | 580 | 597 | 606 |
| 18 | 1015 | 1036 | 1050 | 1068 | 1101 |  | 9.0 | 596 | 598 | 605 | 625 | 636 |
| 19 | 1069 | 1083 | 1100 | 1116 | 1149 |  | 9.5 | 621 | 625 | 632 | 653 | 663 |
| 20 | 1113 | 1136 | 1149 | 1162 | 1198 |  | 10.0 | 643 | 650 | 655 | 682 | 692 |

am and bm are the molalities of sodium cholate and sodium deoxycholate, respectively, in water and water + maltodextrin systems. cmMal is the molality of maltodextrin in water.

Standard uncertainties, ur, are u(T) = 0.1 K, u(ma) = 0.006 mmol·kg−1, u(mb) = 0.003 mmol·kg−1 u(cmMal) = 0.2 mmol·kg−1, and ur () = u()/ = 0.05 (level of confidence = 0.68).

**TABLE S2**

values for sodium cholate and sodium deoxyholate in pure water and aqueous solutions of maltodextrin (ma = 0.5, 1.1, 1.6 mmol∙kg-1) at different temperatures.

| T / K | 103∙ | | | | | | | | |
| --- | --- | --- | --- | --- | --- | --- | --- | --- | --- |
| Sodium cholate | | | |  | Sodium deoxycholate | | | |
| Pure water | 0.5 | 1.1 | 1.6 | Pure water | 0.5 | 1.1 | 1.6 |
| 293.15 | 0.2700 | 0.2600 | 0.2550 | 0.2400 |  | 0.0800 | 0.0700 | 0.2700 | 0.2600 |
| 298.15 | 0.2628 | 0.2556 | 0.2502 | 0.2376 |  | 0.0702 | 0.0648 | 0.2628 | 0.2556 |
| 303.15 | 0.2628 | 0.2556 | 0.2502 | 0.2376 |  | 0.0684 | 0.0648 | 0.2628 | 0.2556 |
| 308.15 | 0.2636 | 0.2592 | 0.2556 | 0.2412 |  | 0.0738 | 0.0715 | 0.2636 | 0.2592 |
| 313.15 | 0.2682 | 0.2628 | 0.2592 | 0.2466 |  | 0.0810 | 0.0774 | 0.2682 | 0.2628 |

am is the molality of maltodextrin in water.Standard uncertainties, u, are u(T) = 0.1 K, u(m) = 0.2 mmol·kg-1, and u() = 0.005·10-3 and 0.004·10-3 in case of sodium cholate and sodium deoxyholate , respectively (level of confidence = 0.68).

**TABLE S3**

The values of constants ‘a, b and c’ for calculations of ∆*H*0m for Sodium cholate and sodium deoxycholate in pure water and aqueous solutions of maltodextrin (am= 0.5, 1.1, 1.6 mmol∙kg-1)

|  | 103∙ | | | | | | | | |
| --- | --- | --- | --- | --- | --- | --- | --- | --- | --- |
| NaC | | | |  | NaDC | | | |
| Pure water | 0.5 | 1.1 | 1.6 | Pure water | 0.5 | 1.1 | 1.6 |
| a | 27.8776 | 27.8476 | 63.9452 | 27.7676 |  | 117.1316 | 207.2656 | 172.816 | 116.7716 |
| b | -0.2404 | -0.2404 | -0.4808 | -0.2404 |  | -0.8414 | -1.4424 | -1.2080 | -0.8414 |
| c | 0.0004 | 0.0004 | 0.0008 | 0.0004 |  | 0.0014 | 0.0028 | 0.0020 | 0.0014 |

am is the molality of maltodextrin in water.Standard uncertainties, u, , u(m) = 0.2 mmol·kg-1, (level of confidence = 0.68).

**FIGURE S1**. Representative plots for enthalpy-entropy compensation of (a) sodium cholate and (b) sodium deoxyholate in1.6 mmol∙kg-1 aqueous solution of maltodextrin.
